# Supplementary material for: Curcumin Nanoparticles Protect against Isoproterenol Induced Myocardial Infarction by Alleviating Myocardial Tissue Oxidative Stress, Electrocardiogram, and Biological Changes
Source: PubMed Central journal article supplement (PMC6696485; doi:10.3390/molecules24152802), 2019-08-01
Supplement: molecules-24-02802-s001.pdf [file molecules-24-02802-s001.pdf]

|                     |        |        |        |        |        |        |        |        |        |        |        |        |        |        |        |        |
|---------------------|--------|--------|--------|--------|--------|--------|--------|--------|--------|--------|--------|--------|--------|--------|--------|--------|
| PR(ms) day<br>12    | 0.3067 | 0.6093 | 0.2248 | 0.2013 | 0.0553 | 0.3711 | 0.3067 | 0.4822 | 0.5653 | 0.9491 | 0.4062 | 0.4822 | 0.9491 | 0.2013 | 0.7983 | 0.7983 |
| QRS (ms)<br>day 12  | 0.6547 | 0.8983 | 0.3711 | 0.8983 | 0.9491 | 1.0000 | 0.9491 | 0.2248 | 0.7015 | 0.4822 | 0.8983 | 0.8480 | 0.8983 | 1.0000 | 0.2248 | 0.9491 |
| QT(ms) day<br>12    | 0.2248 | 0.8480 | 0.2248 | 0.4433 | 0.3067 | 0.1797 | 0.8983 | 0.1599 | 0.1797 | 0.9491 | 1.0000 | 0.2013 | 0.0967 | 0.2502 | 1.0000 | 0.2013 |
| QTc(ms)<br>day 12   | 0.4062 | 0.4822 | 0.1417 | 0.1102 | 0.0350 | 0.0350 | 0.0639 | 0.0639 | 0.0967 | 0.4822 | 0.4822 | 0.6547 | 0.5653 | 0.0350 | 0.0845 | 0.7494 |
| ST(mV) day<br>12    | 0.8480 | 0.3711 | 0.7494 | 0.7015 | 0.6547 | 0.4062 | 0.9491 | 0.5229 | 0.7015 | 0.8983 | 0.2013 | 0.7015 | 0.5229 | 0.2248 | 0.7015 | 0.7494 |
| RR(ms) day<br>15    | 0.0017 | 0.0017 | 0.0017 | 0.0017 | 0.0017 | 0.0017 | 0.0017 | 0.0476 | 0.0017 | 0.0022 | 0.0017 | 0.0017 | 0.0017 | 0.0017 | 0.0017 | 0.0017 |
| HR(b/min)<br>day 15 | 0.0017 | 0.0017 | 0.0017 | 0.0017 | 0.0017 | 0.0017 | 0.0017 | 0.0476 | 0.0017 | 0.0022 | 0.0017 | 0.0017 | 0.0017 | 0.0017 | 0.0017 | 0.0017 |
| PR(ms) day<br>15    | 0.0476 | 0.1252 | 0.0967 | 0.3711 | 0.1599 | 0.7015 | 0.1599 | 0.3711 | 0.4062 | 0.2248 | 0.1797 | 0.6547 | 0.3067 | 0.7494 | 0.2013 | 0.2774 |
| QRS (ms)<br>day 15  | 0.0017 | 0.1252 | 0.0017 | 0.0017 | 0.0017 | 0.0017 | 0.0017 | 0.0017 | 0.0017 | 0.0639 | 0.7983 | 0.0639 | 0.0350 | 0.0017 | 0.0022 | 0.0017 |
| QT(ms) day<br>15    | 0.0017 | 0.0253 | 0.0027 | 0.0017 | 0.0017 | 0.0017 | 0.0017 | 0.0476 | 0.0017 | 0.0088 | 0.0027 | 0.0017 | 0.0476 | 0.0017 | 0.0017 | 0.0017 |
| QTc(ms)<br>day 15   | 0.0017 | 0.0017 | 0.0017 | 0.0017 | 0.0017 | 0.0017 | 0.0017 | 0.0350 | 0.0017 | 0.0027 | 0.0017 | 0.0017 | 0.0127 | 0.0017 | 0.0017 | 0.0017 |
| ST(mV) day<br>15    | 0.0017 | 0.2502 | 0.0639 | 0.0106 | 0.0073 | 0.0017 | 0.0017 | 0.2774 | 0.0215 | 0.5653 | 0.4433 | 0.0049 | 0.0073 | 0.0152 | 0.0088 | 0.0017 |

**Table S2.** P-values for comparisons between the study groups for of lactate dehydrogenase (LDH), aspartate transaminase (ASAT), alanine transaminase (ALAT), and glycemia.

|                  | MI-C vs. C | Cs100+ ISO vs. MI-C | Cs150+ ISO vs. MI-C | Cs200+ ISO vs. MI-C | nC100+ ISO vs. MI-C | nC150+ ISO vs. MI-C | nC200+ ISO vs. MI-C | Cs xxx+ISO vs. Cs yyy+ISO |             |             | nC xxx+ISO vs. nC yyy+ISO |             |             | nC xxx+ISO vs. Cs xxx+ISO |             |             |
|------------------|------------|---------------------|---------------------|---------------------|---------------------|---------------------|---------------------|---------------------------|-------------|-------------|---------------------------|-------------|-------------|---------------------------|-------------|-------------|
|                  |            |                     |                     |                     |                     |                     |                     | 150 vs. 100               | 200 vs. 100 | 200 vs. 150 | 150 vs. 100               | 200 vs. 100 | 200 vs. 150 | 100 vs. 100               | 150 vs. 150 | 200 vs. 200 |
|                  |            |                     |                     |                     |                     |                     |                     | $\alpha 1$                | $\alpha 2$  | $\alpha 3$  | $\alpha 4$                | $\alpha 5$  | $\alpha 6$  | $\beta 1$                 | $\beta 2$   | $\gamma 1$  |
| LDH (U/L)        | 0.0017     | 0.0017              | 0.0017              | 0.0017              | 0.0017              | 0.0017              | 0.0017              | 0.0040                    | 0.0017      | 0.0845      | 0.0017                    | 0.0017      | 0.0181      | 0.0017                    | 0.0017      | 0.0017      |
| ASAT (U/L)       | 0.0017     | 0.0017              | 0.0017              | 0.0017              | 0.0017              | 0.0017              | 0.0017              | 0.0017                    | 0.0017      | 0.0060      | 0.0027                    | 0.0017      | 0.0476      | 0.0017                    | 0.0017      | 0.0017      |
| ALAT (U/L)       | 0.0017     | 0.0017              | 0.0017              | 0.0017              | 0.0017              | 0.0017              | 0.0017              | 0.0181                    | 0.0127      | 0.4822      | 0.0017                    | 0.0017      | 0.0017      | 0.0073                    | 0.0017      | 0.0017      |
| Glycemia (mg/dL) | 0.0017     | 0.0017              | 0.0017              | 0.0017              | 0.0017              | 0.0017              | 0.0017              | 0.0106                    | 0.0049      | 0.3711      | 0.0476                    | 0.0017      | 0.0553      | 0.0027                    | 0.0088      | 0.0017      |

**Table S3.** P-values for comparisons between the study groups for oxidative stress parameters in myocardial tissue.

|                                      | MI-C<br>vs. C | Cs100+<br>ISO vs.<br>MI-C | Cs150+<br>ISO<br>vs.<br>MI-C | Cs200+<br>ISO<br>vs.<br>MI-C | nC100+<br>ISO vs.<br>MI-C | nC150+<br>ISO vs.<br>MI-C | nC200+<br>ISO vs.<br>MI-C | Cs xxx+ISO vs.<br>Cs yyy+ISO |                |                | nC xxx+ISO vs.<br>nC yyy+ISO |                |                | nC xxx+ISO vs.<br>Cs xxx+ISO |                |                |
|--------------------------------------|---------------|---------------------------|------------------------------|------------------------------|---------------------------|---------------------------|---------------------------|------------------------------|----------------|----------------|------------------------------|----------------|----------------|------------------------------|----------------|----------------|
|                                      |               |                           |                              |                              |                           |                           |                           | 150 vs.<br>100               | 200 vs.<br>100 | 200 vs.<br>150 | 150 vs.<br>100               | 200 vs.<br>100 | 200 vs.<br>150 | 100 vs.<br>100               | 150 vs.<br>150 | 200 vs.<br>200 |
|                                      |               | $\alpha 1$                | $\alpha 2$                   | $\alpha 3$                   | $\alpha 4$                | $\alpha 5$                | $\alpha 6$                | $\beta 1$                    | $\beta 2$      | $\gamma 1$     | $\lambda 1$                  | $\lambda 2$    | $\mu 1$        | $\beta 3$                    | $\gamma 2$     | $\epsilon 1$   |
| MDA<br>[nmol/L]                      | 0.0017        | 0.0060                    | 0.0026                       | 0.0017                       | 0.0017                    | 0.0017                    | 0.0017                    | 0.0350                       | 0.0017         | 0.0181         | 0.0088                       | 0.0017         | 0.5224         | 0.0017                       | 0.0017         | 0.0017         |
| NOx<br>[ $\mu$ mol/L]                | 0.0017        | 0.0027                    | 0.0017                       | 0.0017                       | 0.0017                    | 0.0017                    | 0.0017                    | 0.1797                       | 0.0639         | 0.4428         | 0.3352                       | 0.0039         | 0.0040         | 0.0030                       | 0.0030         | 0.0017         |
| TOS [ $\mu$ mol<br>H2O2<br>equiv./L] | 0.0017        | 0.0027                    | 0.0017                       | 0.0017                       | 0.0017                    | 0.0017                    | 0.0017                    | 0.0474                       | 0.0253         | 0.7009         | 0.2003                       | 0.0060         | 0.0405         | 0.0027                       | 0.0027         | 0.0033         |
| Thiol<br>[mmol/L]                    | 0.0017        | 0.0250                    | 0.0040                       | 0.0017                       | 0.0017                    | 0.0016                    | 0.0017                    | 0.1768                       | 0.0070         | 0.0403         | 0.0450                       | 0.0033         | 0.0080         | 0.0017                       | 0.0017         | 0.0017         |
| TAC [mmol<br>Trolox/L]               | 0.0016        | 0.0016                    | 0.0016                       | 0.0016                       | 0.0015                    | 0.0016                    | 0.0016                    | 0.0250                       | 0.0017         | 0.0026         | 0.0038                       | 0.0016         | 0.0017         | 0.0016                       | 0.0016         | 0.0017         |
